# Supplementary material
Source: PubMed Central journal article supplement (PMC5485924)
Supplement: NIHMS865650-supplement-Supplemental_Table_1.pdf [file NIHMS865650-supplement-Supplemental_Table_1.pdf]

**Supplemental Table 1:** Genes included in the qRT-PCR array profiling study

| <b>Gene Symbol</b> | <b>Gene Name</b>                                                                      |
|--------------------|---------------------------------------------------------------------------------------|
| Acaca              | Acetyl-Coenzyme A carboxylase alpha                                                   |
| Acox1              | Acyl-Coenzyme A oxidase 1, palmitoyl                                                  |
| Cfd                | Complement factor D (adipsin)                                                         |
| Adra1d             | Adrenergic receptor, alpha 1d                                                         |
| Aebp1              | AE binding protein 1                                                                  |
| Akt1               | Thymoma viral proto-oncogene 1                                                        |
| Akt2               | Thymoma viral proto-oncogene 2                                                        |
| Akt3               | Thymoma viral proto-oncogene 3                                                        |
| Araf               | V-raf murine sarcoma 3611 viral oncogene homolog                                      |
| Bcl2l1             | Bcl2-like 1                                                                           |
| Braf               | Braf transforming gene                                                                |
| Cap1               | CAP, adenylate cyclase-associated protein 1                                           |
| Cbl                | Casitas B-lineage lymphoma                                                            |
| Cebpa              | CCAAT/enhancer binding protein (C/EBP), alpha                                         |
| Cebpb              | CCAAT/enhancer binding protein (C/EBP), beta                                          |
| Dok1               | Docking protein 1                                                                     |
| Dok2               | Docking protein 2                                                                     |
| Dok3               | Docking protein 3                                                                     |
| Dusp14             | Dual specificity phosphatase 14                                                       |
| Eif2b1             | Eukaryotic translation initiation factor 2B, subunit 1 (alpha)                        |
| Eif4ebp1           | Eukaryotic translation initiation factor 4E binding protein 1                         |
| Ercc1              | Excision repair cross-complementing rodent repair deficiency, complementation group 1 |
| Fbp1               | Fructose biphosphatase 1                                                              |
| Fos                | FBJ osteosarcoma oncogene                                                             |
| Mtor               | Mechanistic target of rapamycin (serine/threonine kinase)                             |
| Frs2               | Fibroblast growth factor receptor substrate 2                                         |
| Frs3               | Fibroblast growth factor receptor substrate 3                                         |
| G6pc               | Glucose-6-phosphatase, catalytic                                                      |
| G6pc2              | Glucose-6-phosphatase, catalytic, 2                                                   |
| Gab1               | Growth factor receptor bound protein 2-associated protein 1                           |
| Gck                | Glucokinase                                                                           |
| Gpd1               | Glycerol-3-phosphate dehydrogenase 1 (soluble)                                        |
| Grb2               | Growth factor receptor bound protein 2                                                |
| Grb10              | Growth factor receptor bound protein 10                                               |
| Gsk3b              | Glycogen synthase kinase 3 beta                                                       |
| Hk2                | Hexokinase 2                                                                          |
| Hras1              | Harvey rat sarcoma virus oncogene 1                                                   |
| Ide                | Insulin-degrading enzyme                                                              |
| Igf1               | Insulin-like growth factor 1                                                          |

|          |                                                                              |
|----------|------------------------------------------------------------------------------|
| Igf1r    | Insulin-like growth factor I receptor                                        |
| Igf2     | Insulin-like growth factor 2                                                 |
| Igfbp1   | Insulin-like growth factor binding protein 1                                 |
| Ins1     | Insulin I                                                                    |
| InsI3    | Insulin-like 3                                                               |
| Insr     | Insulin receptor                                                             |
| Irs1     | Insulin receptor substrate 1                                                 |
| Irs2     | Insulin receptor substrate 2                                                 |
| Jun      | Jun oncogene                                                                 |
| Kras     | V-Ki-ras2 Kirsten rat sarcoma viral oncogene homolog                         |
| Ldlr     | Low density lipoprotein receptor                                             |
| Lep      | Leptin                                                                       |
| Map2k1   | Mitogen-activated protein kinase kinase 1                                    |
| Mapk1    | Mitogen-activated protein kinase 1                                           |
| Nck1     | Non-catalytic region of tyrosine kinase adaptor protein 1                    |
| Nos2     | Nitric oxide synthase 2, inducible                                           |
| Npy      | Neuropeptide Y                                                               |
| Pck2     | Phosphoenolpyruvatecarboxykinase 2 (mitochondrial)                           |
| Pdpk1    | 3-phosphoinositide dependent protein kinase 1                                |
| Pik3ca   | Phosphatidylinositol 3-kinase, catalytic, alpha polypeptide                  |
| Pik3cb   | Phosphatidylinositol 3-kinase, catalytic, beta polypeptide                   |
| Pik3r1   | Phosphatidylinositol 3-kinase, regulatory subunit, polypeptide 1 (p85 alpha) |
| Pik3r2   | Phosphatidylinositol 3-kinase, regulatory subunit, polypeptide 2 (p85 beta)  |
| Pklr     | Pyruvate kinase liver and red blood cell                                     |
| Pparg    | Peroxisome proliferator activated receptor gamma                             |
| Ppp1ca   | Protein phosphatase 1, catalytic subunit, alpha isoform                      |
| Prkcc    | Protein kinase C, gamma                                                      |
| Prkci    | Protein kinase C, iota                                                       |
| Prkcz    | Protein kinase C, zeta                                                       |
| Prl      | Prolactin                                                                    |
| Ptpn1    | Protein tyrosine phosphatase, non-receptor type 1                            |
| Ptprf    | Protein tyrosine phosphatase, receptor type, F                               |
| Raf1     | V-raf-leukemia viral oncogene 1                                              |
| Retn     | Resistin                                                                     |
| Rps6ka1  | Ribosomal protein S6 kinase polypeptide 1                                    |
| Rras     | Harvey rat sarcoma oncogene, subgroup R                                      |
| Rras2    | Related RAS viral (r-ras) oncogene homolog 2                                 |
| Serpine1 | Serine (or cysteine) peptidase inhibitor, clade E, member 1                  |
| Shc1     | Src homology 2 domain-containing transforming protein C1                     |
| Slc27a4  | Solute carrier family 27 (fatty acid transporter), member 4                  |
| Slc2a1   | Solute carrier family 2 (facilitated glucose transporter), member 1 (Glut1)  |
| Slc2a4   | Solute carrier family 2 (facilitated glucose transporter), member 4 (Glut4)  |
| Sorbs1   | Sorbin and SH3 domain containing 1                                           |

|          |                                                           |
|----------|-----------------------------------------------------------|
| Sos1     | Son of sevenless homolog 1 (Drosophila)                   |
| Srebf1   | Sterol regulatory element binding transcription factor 1  |
| Tg       | Thyroglobulin                                             |
| Klf10    | Kruppel-like factor 10                                    |
| Ucp1     | Uncoupling protein 1 (mitochondrial, proton carrier)      |
| Vegfa    | Vascular endothelial growth factor A                      |
| Actb     | Actin, beta                                               |
| Gapdh    | Glyceraldehyde-3-phosphate dehydrogenase                  |
| Gusb     | Glucuronidase, beta                                       |
| Hprt     | Hypoxanthine guanine phosphoribosyltransferase            |
| Hsp90ab1 | Heat shock protein 90 alpha (cytosolic), class B member 1 |
